# Supplementary material for: Clinical Characteristics of Patients with Micrococcus luteus Bloodstream Infection in a Chinese Tertiary-Care Hospital
Source: PubMed Central journal article supplement — Pol J Microbiol. 2021 Sep 17;70(3):321–6. doi: 10.33073/pjm-2021-030 (PMC8459002; doi:10.33073/pjm-2021-030), 2021-09-17
Supplement: 10.33073_pjm-70-3-030_Supplementary.pdf [file 10.33073_pjm-70-3-030_Supplementary.pdf]

Supplementary materials for the article:  
 Zhu M. et al. Clinical Characteristics of Patients with *Micrococcus luteus* Bloodstream Infection in A Chinese Tertiary-Care Hospital  
 Pol J Microbiol. 2021, Vol. 70, No 3, 321–326.

Table SI  
 The detailed results of antibiotic susceptibility tests for *M. luteus*.

| Number <sup>a</sup> | Gentamycin | Penicillin | Cefoxitin | Ampicillin-sulbactam | Cefazolin | Cefuroxime | Levofloxacin | Erythromycin | Clindamycin | Trimethoprim-sulfamethoxazole | Rifampin | Linezolid | Ertapenem | Vancomycin        |
|---------------------|------------|------------|-----------|----------------------|-----------|------------|--------------|--------------|-------------|-------------------------------|----------|-----------|-----------|-------------------|
| 1                   | 31         | 35         | 32        | 36                   | 32        | 31         | 27           | 32           | 35          | 32                            | 30       | 35        | 32        | 25                |
| 2                   | 27         | 36         | 37        | 33                   | 34        | 32         | 32           | 10           | 35          | 37                            | 38       | 38        | 30        | 26                |
| 3                   | 28         | 42         | 35        | 32                   | 41        | 36         | 32           | 37           | 28          | 34                            | 40       | 40        | 20        | 24                |
| 4                   | 22         | 42         | 26        | 44                   | 40        | 38         | 34           | 23           | 29          | 38                            | 36       | 36        | 13        | 26                |
| 5                   | 8          | 6          | 40        | 6                    | 6         | 6          | 9            | 17           | 13          | 6                             | 10       | 28        | 15        | 28                |
| 6                   | 28         | 30         | 30        | 28                   | 28        | 30         | 30           | 10           | 28          | 30                            | 30       | 30        | 28        | 0.38 <sup>b</sup> |
| 7                   | 40         | 40         | 38        | 39                   | 40        | 40         | 36           | 14           | 40          | 34                            | 46       | 40        | 42        | 28                |
| 8                   | 7          | 35         | 35        | 36                   | 38        | 35         | 24           | 6            | 20          | 6                             | 10       | 34        | 18        | 22                |
| 9                   | 15         | 30         | 30        | 25                   | 30        | 30         | 24           | 15           | 6           | 30                            | 26       | 30        | 36        | 28                |
| 10                  | 30         | 34         | 40        | 24                   | 32        | 39         | 21           | 28           | 24          | 28                            | 36       | 36        | 28        | 22                |
| 11                  | 24         | 30         | 33        | 35                   | 35        | 34         | 24           | 8            | 20          | 22                            | 30       | 29        | 27        | 0.5 <sup>b</sup>  |
| 12                  | 30         | 44         | 50        | 52                   | -         | 40         | 28           | 6            | 32          | 42                            | 44       | 46        | 38        | 0.25 <sup>b</sup> |
| 13                  | 26         | 32         | 38        | 34                   | 34        | 32         | 32           | 6            | 24          | 24                            | 34       | 32        | 6         | 22                |
| 14                  | 26         | 34         | 36        | 38                   | 36        | 35         | 25           | 7            | 25          | 30                            | 34       | 36        | 30        | 0.5 <sup>b</sup>  |
| 15                  | 6          | 6          | 38        | 6                    | 6         | 6          | 6            | 17           | 13          | 6                             | 9        | 24        | 6         | 21                |
| 16                  | 20         | 40         | 32        | 30                   | 34        | 32         | 22           | 6            | 17          | 30                            | 34       | 38        | 30        | 20                |
| 17                  | 30         | 30         | 40        | 30                   | 34        | 34         | 21           | 22           | 20          | 6                             | 36       | 40        | 25        | 0.19 <sup>b</sup> |
| 18                  | 32         | 36         | 37        | 37                   | 38        | 38         | 24           | 9            | 28          | 32                            | 33       | 34        | 29        | 25                |
| 19                  | 13         | 25         | 6         | 30                   | 28        | 25         | 26           | 30           | 10          | 30                            | 29       | 30        | 6         | 29                |
| 22                  | 30         | 30         | 32        | 32                   | 28        | 30         | 36           | 33           | 23          | 30                            | 23       | 36        | 35        | 30                |
| 23                  | 28         | 38         | 37        | 34                   | 34        | 32         | 23           | 10           | 25          | 30                            | 33       | 36        | 34        | 0.38 <sup>b</sup> |
| 24                  | 26         | 36         | 35        | 38                   | 34        | 36         | 26           | 40           | 26          | 32                            | 38       | 40        | 8         | 22                |
| 25                  | 36         | 26         | 38        | 34                   | 34        | 34         | 23           | 9            | 23          | 28                            | 18       | 18        | 28        | 21                |
| 26                  | 23         | 15         | 40        | 22                   | 10        | 10         | 8            | 6            | 10          | 34                            | 41       | 40        | 20        | 20                |
| 27                  | 27         | 34         | 30        | 35                   | 37        | 36         | 28           | 15           | 28          | 32                            | 36       | 38        | 34        | 0.25 <sup>b</sup> |
| 28                  | 24         | 32         | 34        | 33                   | 32        | 31         | 25           | 23           | 27          | 30                            | 33       | 36        | 27        | 23                |
| 29                  | 42         | 40         | 34        | 26                   | 32        | 34         | 24           | 8            | 26          | 26                            | 38       | 32        | 28        | 26                |
| 30                  | 22         | 27         | 28        | 27                   | 30        | 31         | 28           | 6            | 27          | 31                            | 32       | 31        | 30        | 30                |
| 31                  | 34         | 36         | 36        | 34                   | 36        | 32         | 23           | 8            | 27          | 31                            | 37       | 39        | 21        | 21                |
| 32                  | 18         | 33         | 37        | 19                   | 28        | 29         | 30           | 8            | 20          | 30                            | 32       | 32        | 15        | 22                |
| 34                  | 28         | 29         | 30        | 25                   | 28        | 26         | 26           | 27           | 17          | 23                            | 28       | 32        | 22        | 23                |
| 35                  | 23         | 33         | 31        | 29                   | 29        | 28         | 28           | 25           | 28          | 28                            | 35       | 34        | 21        | 24                |
| 36                  | 11         | 16         | 38        | 26                   | 16        | 17         | 8            | 20           | 17          | 22                            | 35       | 38        | 28        | 0.5 <sup>b</sup>  |
| 37                  | 35         | 32         | 36        | 32                   | 30        | 32         | 35           | 36           | 35          | 32                            | 33       | 33        | 32        | 32                |

| Number <sup>a</sup> | Gentamycin | Penicillin | Cefoxitin | Ampicillin-sulbactam | Cefazolin | Cefuroxime | Levofloxacin | Erythromycin | Clindamycin | Trimethoprim-sulfamethoxazole | Rifampin | Linezolid | Ertapenem | Vancomycin         |
|---------------------|------------|------------|-----------|----------------------|-----------|------------|--------------|--------------|-------------|-------------------------------|----------|-----------|-----------|--------------------|
| 38                  | 27         | 38         | 39        | 28                   | 33        | 34         | 26           | 9            | 22          | 30                            | 34       | 36        | 24        | 26                 |
| 39                  | 24         | 36         | 40        | 24                   | 24        | 24         | 24           | 12           | 26          | 25                            | 38       | 40        | 30        | 0.5 <sup>b</sup>   |
| 40                  | 30         | 36         | 40        | 32                   | 38        | 34         | 24           | 6            | 26          | 32                            | 36       | 36        | 32        | 30                 |
| 41                  | 27         | 40         | 40        | 34                   | 40        | 34         | 25           | 6            | 25          | 34                            | 38       | 39        | 6         | 22                 |
| 42                  | 26         | 23         | 27        | 23                   | 27        | 29         | 28           | 22           | 10          | 34                            | 40       | 38        | 23        | 0.5 <sup>b</sup>   |
| 43                  | 32         | 32         | 33        | 35                   | 33        | 32         | 25           | 38           | 26          | 35                            | 36       | 32        | 40        | 0.5 <sup>b</sup>   |
| 44                  | 26         | 42         | 40        | 42                   | 42        | 40         | 26           | 6            | 42          | 40                            | 38       | 41        | 24        | 20                 |
| 45                  | 27         | 32         | 34        | 30                   | 27        | 30         | 28           | 8            | 16          | 25                            | 34       | 34        | 21        | 0.125 <sup>b</sup> |
| 47                  | 35         | 36         | 36        | 37                   | 37        | 38         | 27           | 6            | 27          | 30                            | 38       | 36        | 20        | 26                 |
| 48                  | 29         | 34         | -         | 35                   | 34        | 33         | 27           | 10           | 26          | 34                            | 35       | 35        | 31        | 24                 |
| 49                  | 38         | 42         | 43        | 39                   | 42        | 43         | 28           | 8            | 26          | 30                            | 41       | 45        | 34        | 30                 |
| 50                  | 25         | 32         | 32        | 32                   | 32        | 30         | 26           | 24           | 26          | 30                            | 32       | 32        | 31        | 0.19 <sup>b</sup>  |
| 51                  | 6          | 6          | 33        | 7                    | 6         | 6          | 6            | 6            | 6           | 6                             | 35       | 38        | 26        | 21                 |
| 52                  | 35         | 38         | 36        | 38                   | 40        | 36         | 26           | 10           | 27          | 35                            | 39       | 39        | 35        | 36                 |
| 53                  | 30         | 34         | 34        | 33                   | 33        | 33         | 28           | 10           | 33          | 33                            | 35       | 37        | 36        | 25                 |
| 54                  | 32         | 41         | 30        | 38                   | 40        | 41         | 36           | 7            | 34          | 42                            | 46       | 45        | 28        | 27                 |
| 55                  | 23         | 33         | 35        | 32                   | 33        | 31         | 27           | 11           | 25          | 26                            | 36       | 33        | 26        | 21                 |
| 56                  | 26         | 38         | 36        | 34                   | 36        | 36         | 22           | 23           | 26          | 26                            | 34       | 38        | 28        | 16                 |
| 58                  | 33         | 34         | 40        | 31                   | 32        | 34         | 25           | 8            | 29          | 32                            | 36       | 40        | 21        | 22                 |
| 59                  | 25         | 28         | 30        | 29                   | 28        | 27         | 24           | 29           | 23          | 29                            | 29       | 29        | 21        | 23                 |
| 60                  | 25         | 28         | 31        | 30                   | 32        | 33         | 22           | 8            | 23          | 32                            | 36       | 34        | 16        | 21                 |
| 61                  | 40         | 41         | 37        | 36                   | 42        | 39         | 37           | 6            | 31          | 35                            | -        | 44        | 31        | 26                 |
| 62                  | 32         | 42         | 46        | 38                   | 46        | 38         | 28           | 20           | 20          | 38                            | 42       | 40        | 32        | 26                 |
| 63                  | 21         | 25         | 35        | 22                   | 26        | 25         | 6            | 24           | 21          | 23                            | 36       | 35        | 31        | 23                 |
| 64                  | 27         | 31         | 35        | 37                   | 33        | 37         | 25           | 6            | 30          | 30                            | -        | 37        | 31        | 24                 |
| 65                  | 40         | 38         | 40        | 38                   | 36        | 38         | 22           | 10           | 30          | 30                            | 40       | 40        | 28        | 26                 |
| 66                  | 32         | 40         | 40        | 37                   | 34        | 38         | 34           | 8            | 31          | 32                            | 35       | 40        | 36        | 28                 |
| 67                  | 25         | 30         | 32        | 32                   | 33        | 34         | 28           | 6            | 26          | 30                            | 29       | 29        | 28        | 18                 |
| 68                  | 29         | 30         | 28        | 30                   | 34        | 31         | 31           | 31           | 31          | 34                            | 28       | 34        | 34        | 34                 |
| 69                  | 6          | 6          | 37        | 6                    | 6         | 6          | 6            | 7            | 6           | 6                             | 12       | 38        | 7         | 24                 |
| 71                  | 30         | 30         | 29        | 30                   | 31        | 32         | 28           | 30           | 29          | 29                            | 30       | 26        | 30        | 26                 |
| 72                  | 32         | 40         | 48        | 39                   | 40        | 40         | 28           | -            | 31          | 38                            | 48       | 44        | 26        | 27                 |
| 73                  | 10         | 15         | 28        | 13                   | 13        | 14         | 10           | 21           | 22          | 28                            | 24       | 40        | 22        | 28                 |
| 74                  | 25         | 33         | 31        | 29                   | 28        | 31         | 24           | 6            | 6           | 25                            | 30       | 32        | 28        | 23                 |
| 75                  | 6          | 29         | 32        | 28                   | 32        | 29         | 21           | 6            | 22          | 6                             | 31       | 34        | 26        | 20                 |
| 76                  | 24         | 32         | 32        | 29                   | 33        | 30         | 24           | 9            | 29          | 32                            | 36       | 36        | 30        | 20                 |
| 77                  | 27         | 35         | 36        | 36                   | 35        | 35         | 24           | 31           | 32          | 33                            | 30       | 31        | 29        | 21                 |
| 78                  | 23         | 25         | 26        | 28                   | 29        | 26         | 22           | 6            | 24          | 28                            | 25       | 24        | 23        | 26                 |
| 79                  | 18         | 23         | 32        | 29                   | 28        | 29         | 22           | 6            | 20          | 27                            | 34       | 30        | 26        | 22                 |
| 80                  | 41         | 46         | 47        | 46                   | 44        | 39         | 41           | 32           | 39          | 34                            | 41       | 44        | 36        | 41                 |
| 81                  | 26         | 40         | 46        | 42                   | 40        | 38         | 24           | 9            | 32          | 30                            | 40       | 40        | 32        | 24                 |
| 82                  | 28         | 36         | 40        | 36                   | 36        | 34         | 25           | 10           | 26          | 36                            | 8        | 38        | 28        | 23                 |

| Number <sup>a</sup> | Gentamycin | Penicillin | Cefoxitin | Ampicillin-sulbactam | Cefazolin | Cefuroxime | Levofloxacin | Erythromycin | Clindamycin | Trimethoprim-sulfamethoxazole | Rifampin | Linezolid | Ertapenem | Vancomycin |
|---------------------|------------|------------|-----------|----------------------|-----------|------------|--------------|--------------|-------------|-------------------------------|----------|-----------|-----------|------------|
| 84                  | 28         | 36         | 38        | 38                   | 36        | 32         | 25           | 10           | 26          | 30                            | 36       | 36        | 35        | 24         |
| 85                  | 22         | 38         | 32        | 30                   | 32        | 22         | 26           | 9            | 26          | 24                            | 38       | 34        | 32        | -          |
| 86                  | 26         | 38         | 36        | 35                   | 30        | 32         | 28           | 18           | 30          | 36                            | 42       | 36        | 32        | 30         |
| 87                  | 25         | 33         | 32        | 32                   | 32        | -          | 23           | 6            | 28          | 31                            | 37       | 39        | 26        | -          |
| 88                  | 24         | 33         | 40        | 40                   | 40        | 32         | 25           | 8            | 28          | 30                            | 35       | 38        | 32        | 22         |
| 89                  | 17         | 40         | 40        | 38                   | 40        | -          | 30           | 9            | 26          | 34                            | -        | 38        | 28        | 17         |
| 90                  | 28         | 42         | 21        | 44                   | 38        | 38         | 32           | 6            | 16          | 32                            | 32       | 40        | 34        | 23         |
| 91                  | 27         | 40         | 30        | 32                   | 36        | 37         | 24           | 9            | 36          | 32                            | 30       | 36        | 26        | 19         |
| 92                  | 6          | 6          | 40        | 6                    | 16        | 20         | 28           | 28           | 22          | 6                             | 20       | 24        | 30        | 34         |
| 93                  | 22         | 30         | 31        | 32                   | 30        | 28         | 29           | 28           | 32          | 30                            | 36       | 36        | 20        | 25         |
| 94                  | 31         | 32         | 33        | 38                   | 32        | 33         | 35           | 36           | 28          | 39                            | 40       | 42        | 35        | 39         |
| 95                  | 24         | 27         | 33        | -                    | 33        | 35         | 22           | 6            | 24          | 34                            | 33       | 34        | 33        | 25         |
| 96                  | 32         | 40         | 36        | 40                   | 36        | 34         | 26           | 6            | 28          | 38                            | 42       | 40        | 30        | 26         |
| 97                  | 22         | 28         | -         | 32                   | 36        | 24         | 24           | 6            | 26          | 14                            | 24       | 40        | 34        | 26         |

Kirby-Bauer method was used, and data were shown in the form of the diameter of the inhibition zone (mm). Some of the antibiotics marked with '-' were not tested in the susceptibility test.

<sup>a</sup> – The number here refers to patient number. The results of the antibiotic susceptibility test of seven patients were not found in electronic records.

<sup>b</sup> – For these samples, the vancomycin susceptibility was tested using the VITEK2 system, and data were shown as minimum inhibitory concentrations (MIC, ug/ml).

Table SII  
The usage of antimicrobial treatment.

| Empirical therapy antibiotics | Frequency (%) | Definitive therapy antibiotics | Frequency (%) |
|-------------------------------|---------------|--------------------------------|---------------|
| Cephalosporins                | 58 (59.2)     | Cephalosporins                 | 37 (35.2)     |
| Cefoperazone-Sulbactam        | 28 (28.6)     | Cefoperazone-Sulbactam         | 16 (15.2)     |
| Cefuroxime                    | 9 (9.2)       | Ceftriaxone                    | 8 (7.6)       |
| Ceftriaxone                   | 8 (8.2)       | Cefuroxime                     | 7 (6.7)       |
| Cefmetazole                   | 5 (5.1)       | Cefmetazole                    | 3 (2.9)       |
| Ceftazidime                   | 4 (4.1)       | Ceftazidime                    | 1 (1.0)       |
| Cefepime                      | 2 (2.0)       | Cefepime                       | 1 (1.0)       |
| Cefotaxime                    | 1 (1.0)       | Cefotaxime                     | 1 (1.0)       |
| Cefaclor                      | 1 (1.0)       | Glycopeptides                  | 28 (26.7)     |
| Quinolones                    | 21 (21.4)     | Vancomycin                     | 17 (16.2)     |
| Moxifloxacin                  | 12 (12.2)     | Teicoplanin                    | 11 (10.5)     |
| Levofloxacin                  | 9 (9.2)       | Carbapenems                    | 19 (18.1)     |
| Carbapenems                   | 7 (7.1)       | Imipenem                       | 10 (9.5)      |
| Meropenem                     | 4 (4.1)       | Meropenem                      | 7 (6.7)       |
| Biapenem                      | 3 (3.1)       | Biapenem                       | 1 (1.0)       |
| Other beta lactams            | 8 (8.2)       | Ertapenem                      | 1 (1.0)       |
| Aminoglycosides               | 2 (2.0)       | Quinolones                     | 10 (9.5)      |
| Tigecycline                   | 1 (1.0)       | Moxifloxacin                   | 5 (4.8)       |
| Macrolides                    | 1 (1.0)       | Levofloxacin                   | 5 (4.8)       |
|                               |               | Linezolid                      | 3 (2.9)       |
|                               |               | Other beta lactams             | 4 (3.8)       |
|                               |               | Aminoglycosides                | 2 (1.9)       |
|                               |               | Tigecycline                    | 1 (1.0)       |
|                               |               | Macrolides                     | 1 (1.0)       |
| Total                         | 98 (100.0)    | Total                          | 105 (100.0)   |

Empirical therapy antibiotics were defined as the antibiotics used before any result of the susceptibility test was available. In contrast, definitive therapy antibiotics were defined as those used after the susceptibility test results were available.
